# Supplementary material for: Surface-active ionic liquids for palladium-catalysed cross coupling in water: effect of ionic liquid concentration on the catalytically active species
Source: Royal Society of Chemistry journal article supplement (doi:10.1039/c7ra07757b), 2017-01-01
Supplement: c7ra07757b1.pdf [file c7ra07757b1.pdf]

## Electronic supporting information

# Surface-active ionic liquids for Palladium-catalysed cross coupling in water: Effect of ionic liquid concentration on the catalytically active species

Meltem Taskin,<sup>a</sup> Alice Cognigni,<sup>a</sup> Ronald Zirbs,<sup>b</sup> Erik Reimhult<sup>b</sup> and Katharina Bica<sup>a,\*</sup>

<sup>a</sup> Institute of Applied Synthetic Chemistry, Vienna University of Technology, Getreidemarkt 9/163, 1060 Vienna (Austria), Fax: +43 1 58801 16360; Tel: +43 1 58801 163601. E-mail:

[katharina.bica@tuwien.ac.at](mailto:katharina.bica@tuwien.ac.at) or [katharina.schroeder@tuwien.ac.at](mailto:katharina.schroeder@tuwien.ac.at) .

<sup>b</sup> Group for Biologically Inspired Materials, Institute of Nanobiotechnology (DNBT), University of Natural Resources and Life Sciences, Muthgasse 11, 1190 Vienna, Austria.

1. Table S1: Critical micelle concentrations for all involved ionic liquids ..... 2
2. Figure S1: Concentration dependence of the Heck reaction of ethyl acrylate 9 and iodobenzene 10 in aqueous solution of ionic liquids [C<sub>12</sub>mim]Cl 1 using DBU as base..... 3
3. Figure S2: Copy of <sup>13</sup>C NMR spectroscopy showing the formation of a Pd-carbene at 177 ppm..... 4

## 1. Table S1: Critical micelle concentrations for all involved ionic liquids

| Ionic Liquid | CMC [mM] <sup>a</sup>     |                              |
|--------------|---------------------------|------------------------------|
|              | Conductivity <sup>b</sup> | Surface tension <sup>c</sup> |
| <b>1</b>     | 14.53 [1]                 | 13.25 [1]                    |
| <b>2</b>     | 13.75 [2]                 | 10.33 [2]                    |
| <b>3</b>     | 2.69 [3]                  | 2.31 [3]                     |
| <b>4</b>     | 4.32                      | 3.24                         |
| <b>5</b>     | 5.52                      | 4.33                         |
| <b>6</b>     | 5.69                      | 5.07                         |
| <b>7</b>     | 5.04                      | 4.91                         |
| <b>8</b>     | 4.17                      | 5.61                         |

<sup>a</sup> Solutions were prepared with doubly-distilled Millipore Milli-Q water. Samples were equilibrated at 25 °C with a HAAKE K15 thermostat before measurements. <sup>b</sup> Conductivity measurement were performed on a Mettler Toledo SevenExcellence system. InLAB® 741-ISM electrode (cell constant k = 0.105). The conductimeter was calibrated with a standard KCl solution and measurements were performed in duplicate; <sup>c</sup> Surface tension was determined with the Du Noüy ring method on a Krüss tensiometer at RT. Each measurement was repeated 5 times.

<sup>1</sup> A. Cognigni, P. Gaertner, R. Zirbs, H. Peterlik, K. Prochazka, C. Schröder and K. Bica, *Phys. Chem. Chem. Phys.*, 2016, **18**, 13375–13384.

<sup>2</sup> A. Cognigni, S. Kampichler and K. Bica, *J. Colloid Interface Sci.*, 2017, **492**, 136–145.

<sup>3</sup> X.-f. Liu, L.-l. Dong and Y. Fang, *J. Surfactants Deterg.*, 2011, **14**, 203–210.

2. Figure S1: Concentration dependence of the Heck reaction of ethyl acrylate 9 and iodobenzene 10 in aqueous solution of ionic liquids [C<sub>12</sub>mim]Cl 1 using DBU as base.

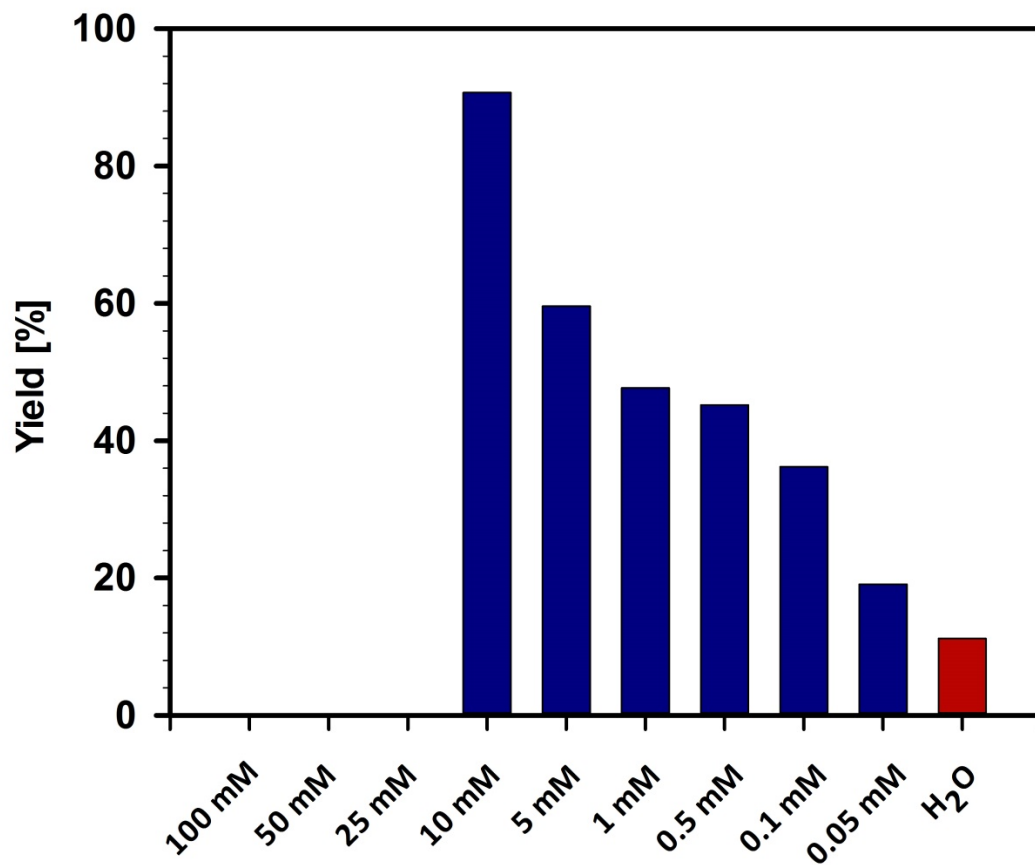

3. Figure S2: Copy of  $^{13}\text{C}$  NMR spectroscopy showing the formation of a Pd-carbene at 177 ppm.

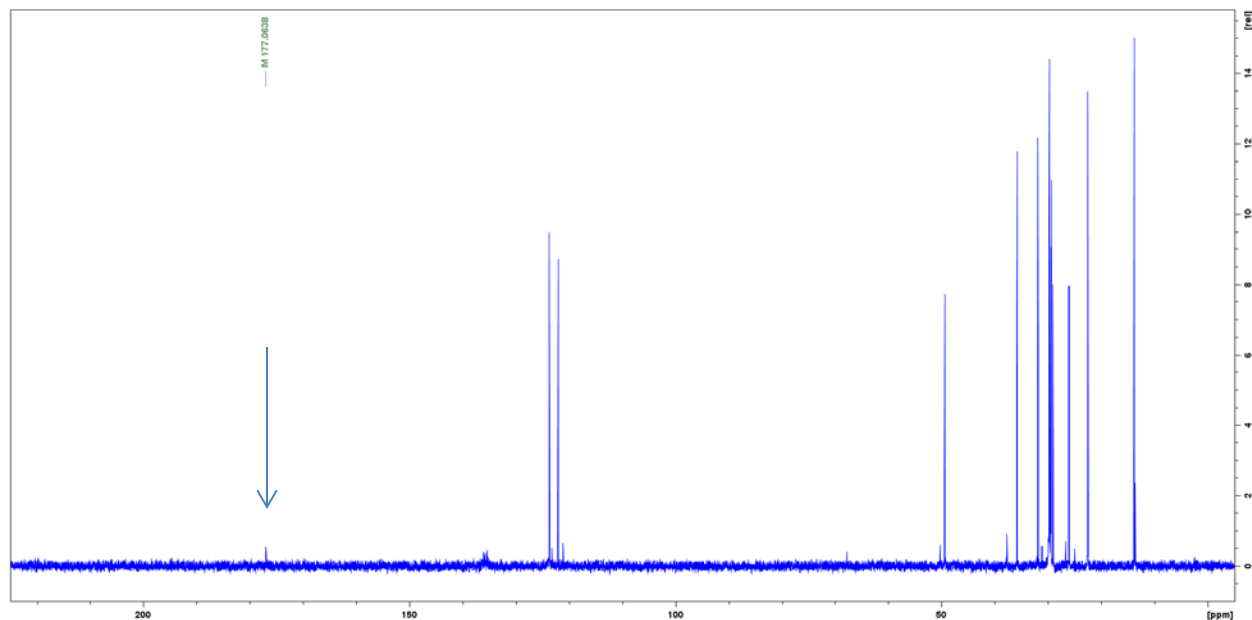

Conditions: 2 mL  $[\text{C}_{12}\text{mimCl}] \mathbf{2}$  solution (50 mM) in  $\text{D}_2\text{O}$ , 0.02 mmol  $\text{Pd}_2\text{allyl}_2\text{Cl}_2$  and 0.02 mmol  $\text{K}_2\text{CO}_3$ ; 30 min at 80 °C under air.

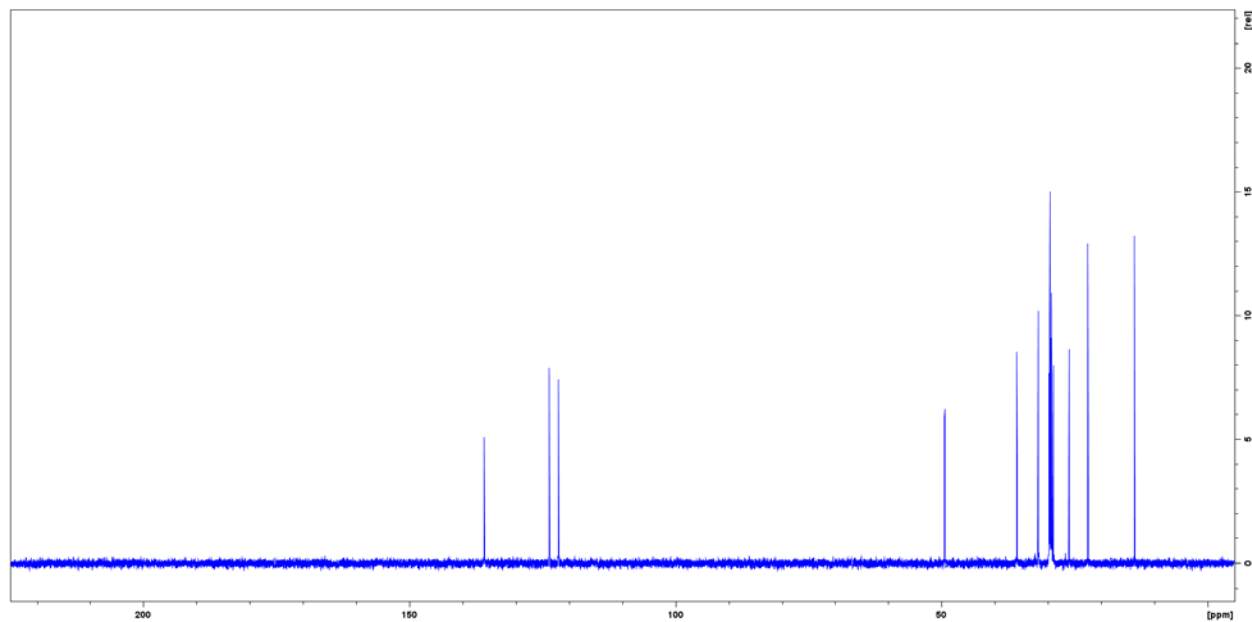

Conditions:  $[\text{C}_{12}\text{mimCl}] \mathbf{2}$  solution (50 mM) in  $\text{D}_2\text{O}$
